# Supplementary material
Source: PubMed Central journal article supplement (PMC7902475)
Supplement: NIHMS1664217-supplement-Supplemental_Material.pdf [file NIHMS1664217-supplement-Supplemental_Material.pdf]

## Supplemental materials for

### A highly conserved glutamic acid in ALFY inhibits membrane binding to aid in aggregate clearance

#### Authors:

Erin F. Reinhart<sup>1</sup>, Nicole A. Litt<sup>2</sup>, Sarah Katzenell<sup>1</sup>, Maria Pellegrini<sup>1</sup>, Ai Yamamoto<sup>2</sup>, Michael J. Ragusa<sup>1,3</sup>

#### Contact information:

<sup>1</sup>Department of Chemistry, Dartmouth College, Hanover, New Hampshire 03755

<sup>2</sup>Department of Neurology, Pathology and Cell Biology, Columbia University, New York, New York 10032

<sup>3</sup>Department of Biochemistry and Cell Biology, Geisel School of Medicine, Dartmouth College, Hanover, New Hampshire 03755

Correspondence to Michael J. Ragusa: [michael.j.ragusa@dartmouth.edu](mailto:michael.j.ragusa@dartmouth.edu)

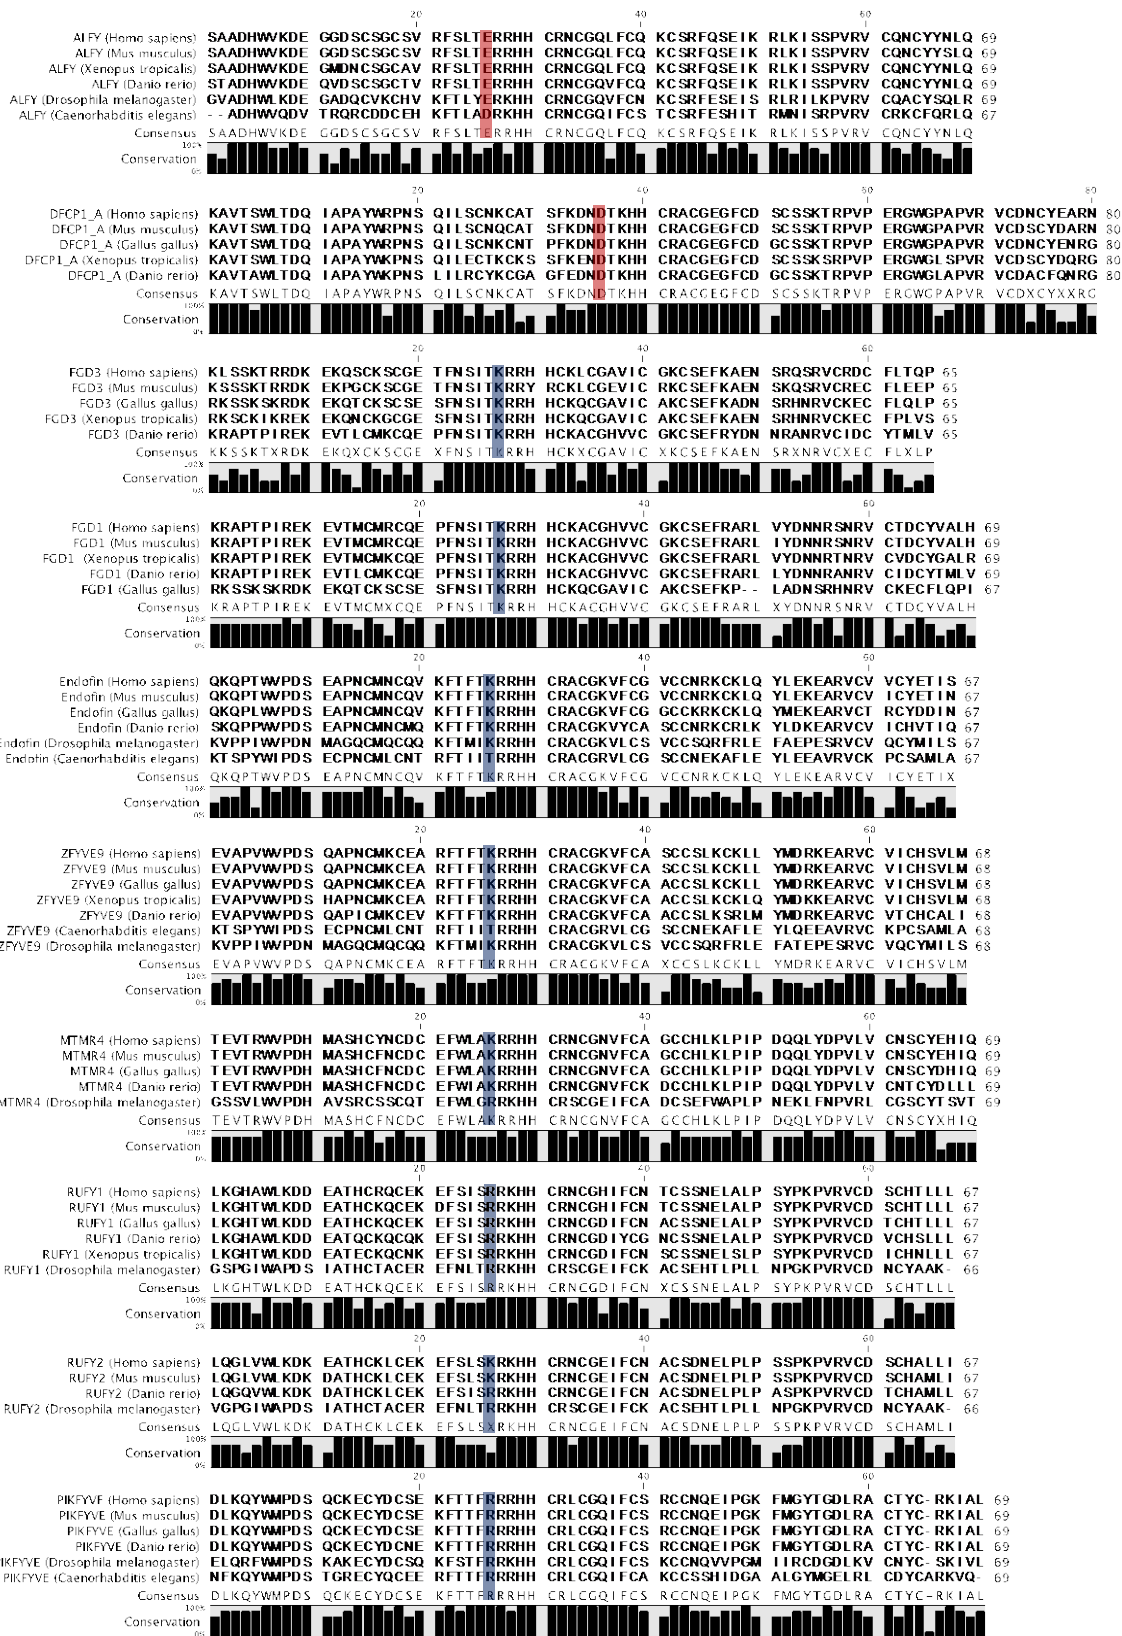

|                                   |                    |              |               |                |                 |              |               |              |    |
|-----------------------------------|--------------------|--------------|---------------|----------------|-----------------|--------------|---------------|--------------|----|
| LST2 (Homo sapiens)               | EDPPEWVDE          | ACGFCTACKA   | PFTVIRKHH     | CRSCGKIFCS     | RCSSH SAPLP     | RYGQVKPVRV   | CTHCYMFHV     | 69           |    |
| LST2 (Mus musculus)               | EDPPEWVDE          | ACGFCTACKA   | PFTVIRKHH     | CRSCGKIFCS     | RCSSH SAPLP     | RYGQVKPVRV   | CTHCYMFHV     | 69           |    |
| LST2 (Danio rerio)                | EDPPEWVDE          | ACNSCTACKA   | PFTVIRKHH     | CRSCGKIFCS     | RCSSH SAPLP     | RYGQVKPVRV   | CTHCYMFHV     | 69           |    |
| LST2 (Xenopus tropicalis)         | EDPDWVDE           | VCSLCTACKA   | PFTVIRKHH     | CRSCGKIFCS     | RCSSH SAPLP     | RYGQVKPVRV   | CTHCYMFHV     | 69           |    |
| LST2 (Caenorhabditis elegans)     | FMGVRWVDE          | DCEQCTACSM   | PFNFVRRHH     | CRNCGRI FCH    | KCSNT I SIP     | EHGDRKVRV    | CNL CYVHRL    | 69           |    |
| LST2 (Drosophila melanogaster)    | LSPPAWIPDG         | KAPRCMACQT   | PFTAFRRHH     | CRNCGVFCG      | VCSNASAPLP      | KYGLTKAVRV   | CRDCYVREV     | 69           |    |
| Consensus                         | EDPPEWVDE          | ACGFCTACKA   | PFTVIRKHH     | CRSCGKIFCS     | RCSSH SAPLP     | RYGQVKPVRV   | CTHCYMFHV     |              |    |
| Conservation                      |                    |              |               |                |                 |              |               |              |    |
| FGD2 (Homo sapiens)               | LRAPQWRDK          | MVTMCMRCQE   | PFNALT RRRH   | HCRACGYVVC     | ARCSDYRAEL      | KYDNRPNRV    | CLHCYAFLLT    | 69           |    |
| FGD2 (Mus musculus)               | LRAPQWRDK          | MVTMCMRCQE   | PFNALT RRRH   | HCRACGYVVC     | AKCSDYRAEL      | KYDNRPNRV    | CLTCYFLLT     | 69           |    |
| Consensus                         | LRAPQWRDK          | MVTMCMRCQE   | PFNALT RRRH   | HCRACGYVVC     | AXCSDYRAEL      | KYDNRPNRV    | CLXCXFLT      |              |    |
| Conservation                      |                    |              |               |                |                 |              |               |              |    |
| FGD4 (Homo sapiens)               | KRAPRWI RDN        | EVTMCMCKE    | PFNALT RRRH   | HCRACGYVVC     | WKCSDYKAQL      | EYDGGKLSKV   | CKDCYQI ILS   | 69           |    |
| FGD4 (Mus musculus)               | KRAPRWI RDN        | EVTMCMCKE    | PFNALT RRRH   | HCRACGYVVC     | WKCSDYKAQL      | EYDGGRI NKV  | CKDCYQI ILS   | 69           |    |
| FGD4 (Xenopus tropicalis)         | KRAPRWI RDN        | EVTMCMCKE    | GFNALT RRRH   | HCRACGYVVC     | WKCSDYKATL      | EYDSKMKV     | CKDCYK ILL    | 69           |    |
| FGD4 (Danio rerio)                | KRAPRWI RDN        | EVTMCMCKE    | GFNALT RRRH   | HCRACGYVVC     | WKCSDYKATL      | EYDGNKI SKV  | CKDCYK ILL    | 69           |    |
| FGD4 (Gallus gallus)              | KRAPRWI RDN        | EVTMCMCKE    | PFNALT RRRH   | HCRACGYVVC     | WKCSDYKAIL      | EYDGNKI NKV  | CKDCYHIV I    | 69           |    |
| Consensus                         | KRAPRWI RDN        | EVTMCMCKE    | PFNALT RRRH   | HCRACGYVVC     | WKCSDYKAXL      | EYDGNKLNKV   | CKDCYQI ILS   |              |    |
| Conservation                      |                    |              |               |                |                 |              |               |              |    |
| PLEKHF1 (Homo sapiens)            | EHAAPWIPDK         | ATD I CMRCTQ | TRFSAL T RRRH | HCRKCGFVVC     | AECSSRQRFLL     | PRLSPKPLRV   | CSLCYRELA     | 69           |    |
| PLEKHF1 (Mus musculus)            | EHAAPWIPDK         | ATD I CMRCTQ | TRFSAL T RRRH | HCRKCGFVVC     | AECSSRERFLL     | PRLSPKPLRV   | CSLCYRELA     | 69           |    |
| PLEKHF1 (Gallus gallus)           | EHAAPWIPDK         | ATD I CMRCTQ | TKFSTL T RRRH | HCRKCGFVVC     | GDSCSRQRFLL     | PRLSPKPLRV   | CNL CYRQLL    | 69           |    |
| PLEKHF1 (Xenopus tropicalis)      | EHAAPWIPDK         | ATD I CMRCTQ | INFTLVNRRH    | HCRKCGFVVC     | HECSKYKFLI      | PT I KSKPLRV | CSLCYK ILL    | 69           |    |
| PLEKHF1 (Caenorhabditis elegans)  | AHAAPWIPDG         | EAVKCMVCGK   | TGFNLVQRRH    | HCRNCGRVVC     | GACSSRT FRI     | DNVHKKPVRV   | CDHCFDSL S    | 69           |    |
| Consensus                         | EHAAPWIPDK         | ATD I CMRCTQ | TRFSAL T RRRH | HCRKCGFVVC     | XECSSRQRFLL     | PRLSPKPLRV   | CSLCYRELA     |              |    |
| Conservation                      |                    |              |               |                |                 |              |               |              |    |
| ANKFY1 (Homo sapiens)             | SKEPPWCDGS         | NCYECTARFG   | VTRKHHCRRH    | CGRL I CHIKCS  | TKEIPI I KFD    | LNKPVRVCI    | CFDVL T       | 66           |    |
| ANKFY1 (Mus musculus)             | SKEPPWCDGS         | NCYECTAKFG   | VTRKHHCRRH    | CGRL I CHIKCS  | TKEIPI I KFD    | LNKPVRVCI    | CFDVL T       | 66           |    |
| ANKFY1 (Gallus gallus)            | SKEPPWCDGS         | NCYECTAKFG   | VTRKHHCRRH    | CGRL I CHIKCS  | TKEIPI I KFD    | LNKPVRVCI    | CFDVL T       | 66           |    |
| ANKFY1 (Xenopus tropicalis)       | SKEPPWCDGS         | NCYECTAKFG   | VTRKHHCRRH    | CGRL I CHIKCS  | TKEIPI I KFD    | LNKPVRVCI    | CFDVL T       | 66           |    |
| ANKFY1 (Danio rerio)              | SKEPPWCDGS         | NCYECTAKFG   | VTRKHHCRRH    | CGRL I CHIKCS  | TKEIPI I KFD    | LNKPVRVCI    | CFDVL T       | 66           |    |
| ANKFY1 (Drosophila melanogaster)  | PQESPWVESD         | YQCHGTNRFT   | ITMRKHHCRRH   | CGRVL CSKCS    | CNDVPI L KFG    | LNKPVRCV T   | CNVLQ T       | 66           |    |
| ANKFY1 (Caenorhabditis elegans)   | EAPRWSDGD          | I C DCGARF S | L I SRKHHCRRH | CGRIVCSKCS     | ET T MPT I AKYG | EKKRVRVCDV   | CAHVI S       | 65           |    |
| Consensus                         | SKEPPWCDGS         | NCYECTAKFG   | VTRKHHCRRH    | CGRL I CHIKCS  | TKEIPI I KFD    | LNKPVRVCI    | CFDVL T       |              |    |
| Conservation                      |                    |              |               |                |                 |              |               |              |    |
| HRS (Homo sapiens)                | ERAPDWDAE          | ECHR CRVQFG  | VTRKHHCRA     | CGQ I FCGKCS   | SKYST I PKFG    | I EKEVRVCEP  | CYEQLN        | 66           |    |
| HRS (Mus musculus)                | ERAPDWDAE          | ECHR CRVQFG  | VTRKHHCRA     | CGQ I FCGKCS   | SKYST I PKFG    | I EKEVRVCEP  | CYEQLN        | 66           |    |
| HRS (Xenopus tropicalis)          | ERAPDWDAE          | ECHR CRVQFG  | VTRKHHCRA     | CGQ I FCGKCS   | SKYST I PKFG    | I EKEVRVCEP  | CYEQLN        | 66           |    |
| HRS (Gallus gallus)               | ERAPDWDAE          | ECHR CRVQFG  | VTRKHHCRA     | CGQ I FCGKCS   | SKYST I PKFG    | I EKEVRVCEP  | CYEHLN        | 66           |    |
| HRS (Danio rerio)                 | ERAPDWDAE          | ECHR CRVQFG  | VTRKHHCRA     | CGQ I FCGKCS   | SKYST I PKFG    | I EKEVRVCEP  | CFE I LN      | 66           |    |
| HRS (Caenorhabditis elegans)      | QVAPWADGP          | ECYRCRVEFS   | VTRKHHCRA     | CGQ I FCDKCS   | SRELAL PQFG     | I EKEVRVCE T | CYEEKV        | 66           |    |
| HRS (Drosophila melanogaster)     | DTAPNWDGR          | VCHR CRVFTT  | FTRKHHCRRH    | CGQVFCGQCT     | AKQCP I PKYG    | I EKEVRVCDG  | CF AAL Q      | 66           |    |
| Consensus                         | ERAPDWDAE          | ECHR CRVQFG  | VTRKHHCRA     | CGQ I FCGKCS   | SKYST I PKFG    | I EKEVRVCEP  | CYEQLN        |              |    |
| Conservation                      |                    |              |               |                |                 |              |               |              |    |
| ZFYVE21 (Homo sapiens)            | LEEPQWVDPK         | ECPRCMQCDA   | KDFD I TRKHH  | CRRCGKCFCD     | RCCSQKVP L R    | RMC FVDPVRQ  | CAECALVSL     | 69           |    |
| ZFYVE21 (Mus musculus)            | LEEPQWVDPK         | ECPRCMQCDA   | KDFD I TRKHH  | CRRCGKCFCD     | RCCSQKVP L R    | RMC FVDPVRQ  | CADCALVSH     | 69           |    |
| ZFYVE21 (Gallus gallus)           | LDEPPWVDPK         | ECPRCMQCDA   | KDFD I TRKHH  | CRRCGKCFCD     | KCCSKKVP L R    | RMC FVDPVRQ  | CAECALV SQ    | 69           |    |
| ZFYVE21 (Danio rerio)             | LDEPPWVDPK         | ECPRCMQCDA   | KDFD I TRKHH  | CRRCGKCFCD     | KCCSKKVP L R    | RMC FVDPVRQ  | CAECALV SQ    | 69           |    |
| ZFYVE21 (Xenopus tropicalis)      | LEEPQWVDPK         | ECPRCMQCDA   | KDFD I TRKHH  | CRRCGKCFCD     | KCCSKKVP L R    | RMC FVDPVRQ  | CGECSV I SQ   | 69           |    |
| Consensus                         | LEEPQWVDPK         | ECPRCMQCDA   | KDFD I TRKHH  | CRRCGKCFCD     | KCCSQKVP L R    | RMC FVDPVRQ  | CAECALV SQ    |              |    |
| Conservation                      |                    |              |               |                |                 |              |               |              |    |
| PLEKHF2 (Homo sapiens)            | EHAAVWV PDS        | EATVCMRCQK   | AKFT PVNRRH   | HCRKCGFVVC     | GPCSEKRFLL      | PSQSSKPVRI   | CDFCYD LLS    | 69           |    |
| PLEKHF2 (Mus musculus)            | EHAAVWV PDS        | EATVCMRCQK   | AKFT PVNRRH   | HCRKCGFVVC     | GPCSEKRFLL      | PSQSSKPVRI   | CDFCYD LLS    | 69           |    |
| PLEKHF2 (Gallus gallus)           | EHAAVWV PDS        | EATVCMRCQK   | AKFT PVNRRH   | HCRKCGFVVC     | GPCSEKRFLL      | PSQSSKPVRI   | CDFCYD LLS    | 69           |    |
| PLEKHF2 (Xenopus tropicalis)      | EHAAVWV PDS        | EATVCMRCQK   | AKFT PVNRRH   | HCRKCGFVVC     | GPCSEKRYLL      | PSQSSKPVRI   | CDFCYD LLS    | 69           |    |
| PLEKHF2 (Danio rerio)             | EHAAVWV PDS        | EATVCMRCQK   | AKFT PVNRRH   | HCRKCGFVVC     | GPCSEKRFLL      | PSQSSKPVRI   | CEFCYD LLS    | 68           |    |
| PLEKHF2 (Drosophila melanogaster) | NHAAVWV PDS        | DAVCMRCQK    | TQFT I IRRH   | HCRNCGAVVC     | AGCSAKKFLI      | PQST KALRV   | CDACER I KV   | 69           |    |
| PLEKHF2 (Caenorhabditis elegans)  | AHAAVWV PDS        | EAVKCMVCGK   | TGFNLVQRRH    | HCRNCGRVVC     | GACSSRT FRI     | DNVHKKPVRV   | CDHCDL S LA   | 69           |    |
| Consensus                         | EHAAVWV PDS        | EATVCMRCQK   | AKFT PVNRRH   | HCRKCGFVVC     | GPCSEKRFLL      | PSQSSKPVRI   | CDFCYD LLS    |              |    |
| Conservation                      |                    |              |               |                |                 |              |               |              |    |
| RBSN (Homo sapiens)               | KSVVPWNQD          | DVPFCPCGN    | KFSI RNRHH    | CR LCGS I MCK  | KCME L I S I PL | ANKLT SASKE  | SI STH T SPSQ | SPNSVHGSRR   | 80 |
| RBSN (Mus musculus)               | KSVVPWNQD          | DVPFCPCGN    | KFSI RNRHH    | CR LCGS I MCK  | KCME L I S I PL | AHKL T SASKE | SI STH T SPSQ | SPNSVHGSRR   | 80 |
| RBSN (Gallus gallus)              | KSVVPWNQD          | DVPFCPCGN    | KFSI RNRHH    | CR LCGS I MCK  | KCME L I S I PL | ASKLT SASKE  | AI SSI T SPSA | SPNSVHGSRR   | 80 |
| RBSN (Xenopus tropicalis)         | KSVVPWNQD          | DVPFCPCGN    | KFSI RNRHH    | CR LCGS I MCK  | KCME L I S I PL | ASKLT SASKE  | SI SAHGS PNL  | SSSSAQ T SRR | 80 |
| RBSN (Danio rerio)                | KSVVPWNQD          | DVPFCPCGN    | KFSI RNRHH    | CR LCGS I MCK  | KCTE FVPL PM    | AYKLT SGTRE  | AI WAPGSGS    | PAVVQ T SRR  | 80 |
| RBSN (Caenorhabditis elegans)     | REVPWLD DA         | EAVCCPLCAS   | RFGL T RRRHH  | CR LCGRVLCH    | SCSKFL SFT      | AKT LSNPLGD  | HI I EAPNTVEN | ERSFFSKMKA   | 80 |
| RBSN (Drosophila melanogaster)    | QQTVAW DGS         | SVKLCPSCAK   | SFI I ARRRHH  | CR LCGG I MCKN | DCSKFL PL ED    | AMQLAS I STT | -----         | SPL -----    | 63 |
| Consensus                         | KSVVPWNQD          | DVPFCPCGN    | KFSI RNRHH    | CR LCGS I MCK  | KCME L I S I PL | ASKLT SASKE  | SI STH T SPSQ | SPNSVHGSRR   |    |
| Conservation                      |                    |              |               |                |                 |              |               |              |    |
| RBSN (Homo sapiens)               | GS I SSMSSVS       | SVLDEKDDDR   | IR CCTHCKDT   | LL             | 112             |              |               |              |    |
| RBSN (Mus musculus)               | GS I SSMSSVS       | SVLDEKDDDR   | IR CCTHCKDK   | LL             | 112             |              |               |              |    |
| RBSN (Gallus gallus)              | GS I SSI SSVS      | SVLDEKDDDD   | IR CCTHCKDT   | LL             | 112             |              |               |              |    |
| RBSN (Xenopus tropicalis)         | GS I SSI SSVS      | SVLEKDDDK    | IR CCTHCKDT   | LL             | 112             |              |               |              |    |
| RBSN (Danio rerio)                | GS I SSI SSVI      | SVLEKDDDR    | IR CCTHCKDA   | LL             | 112             |              |               |              |    |
| RBSN (Caenorhabditis elegans)     | GAVQKVE I I A      | ALNFDL SEH   | MRCVNI CLRD   | LL             | 112             |              |               |              |    |
| RBSN (Drosophila melanogaster)    | -----              | QLLHQHENA    | IRLCEHCLWL    | LD             | 84              |              |               |              |    |
| Consensus                         | GS I S S X S S V S | SVLX EKDDDR  | IR CCTHCKDT   | LL             |                 |              |               |              |    |
| Conservation                      |                    |              |               |                |                 |              |               |              |    |

ZFYVE26 (Homo sapiens) PARHQWVPE TESI CMVCCR EHFTMFRRH HCRRCGRVVC SSCSTKMMV EGCRENPARV CDQCYSYCN 69  
 ZFYVE26 (Mus musculus) PARHQWVPE TESVCMVCCR EHFTMFRRH HCRRCGRVVC GSCSTKMMV EGFRENPTRV CDQCYSYCN 69  
 ZFYVE26 (Gallus gallus) PLKQKQV PDD TET I CMVCKT ERFTMFRRH HCRRCGRVVC SSCSTKMMV EACRENPARV CDQCYSYCN 69  
 ZFYVE26 (Xenopus tropicalis) PAKTQWV PDE REV I CMVCKN ERFTMFRRH HCRRCGRVVC SSCSMKRMV EGCRENPARV CDQCHAYFS 69  
 ZFYVE26 (Danio rerio) PDRKDWV PDH KQH I CMVCKR ERFTMFRRH HCRRCGRVVC HSCSSKMMV AGFD EPVVR CDQCYNFFH 68  
 ZFYVE26 (Drosophila melanogaster) PNRQQRV RDE EASHCMCRR AAFITMLRRH HCRRCGRVVC YACSTHTR I PELYELEVR I CDQCAAGST 69  
 Consensus PARQKWV PDE TESI CMVCCR ERFTMFRRH HCRRCGRVVC SSCSTKMMV EGCRENPARV CDQCYSYCN  
 Conservation

MTMR3 (Homo sapiens) T E M I R W L P D H L A A H C Y A C D S A F W L A S R K H H C R N C G N V F C S S C C N Q K V P V P S Q Q L F E P S R V C K S C Y S S L H 69  
 MTMR3 (Mus musculus) T E M I R W L P D H L A A H C Y A C D S A F W L A S R K H H C N C G N V F C S S C C N Q K V P V P S Q Q L F E P S R V C K S C Y S S L H 68  
 MTMR3 (Gallus gallus) T E M I R W L P D H L A A H C Y G C D S T F W L A S R K H H C N C G N V F C S S C C N Q K V P V P S Q Q L F E P S R V C K S C Y S S L H 68  
 MTMR3 (Xenopus tropicalis) T E V T R W P P D H V A H N C Y N C D S K F W L A S R K H H C N C G N V F C S T C C N Q K A P V P S Q Q L F E P S R V C K I C F T N I H 68  
 MTMR3 (Danio rerio) T E V T R W P P D H L A A Q C Y G C E R G F W L A S R K H H C N C G N V F C G S C C D Q K I P V P S Q Q L F E P S R V C R S C F S N L G 68  
 MTMR3 (Drosophila melanogaster) G S S V L W P P D H A V S R C S S C Q T E F W L G R R K H H C S C G E I F C A D C S E F W A P L P N E K I F N P V R L C G S C Y T S V T 68  
 Consensus T E V T R W L P D H L A A H C Y C D S A F W L A S R K H H C N C G N V F C S S C C N Q K V P V P S Q Q L F E P S R V C K S C Y S S L H  
 Conservation

WDFY1 (Homo sapiens) G G I A V W N M D V S R E E A P Q W L E S D S C Q K C E Q P F F W N I K Q M W D T K T L G L R Q H H C R K C G Q A V C G K C S S K R S S Y P V M G F E F Q V R V 80  
 WDFY1 (Mus musculus) G G I A V W N M D V S R E E A P Q W L E S D S C Q K C E Q P F F W N I K Q M W D T K T L G L R Q H H C R K C G Q A V C G K C S S K R S S Y P V M G F E F Q V R V 80  
 WDFY1 (Gallus gallus) G G I A V W N M D I S R E E A P Q W L E S D S C Q K C E Q P F F W N I K Q M W D T K T L G L R Q H H C R K C G Q A V C G K C S T K R S S Y P I M G F E F Q V R V 80  
 WDFY1 (Xenopus tropicalis) G G I T V W N M D I D R E E A P Q W L E S D S C Q K C S Q P F F W N I K Q M W D T K T V G L R Q H H C R K C G Q A V C G K C S S K R S S Y P I M G F E F Q V R V 80  
 WDFY1 (Danio rerio) S G V T V W N M D T R Q E A P Q W L D S D S C Q K C E Q P F F W N I K Q M W D T K T L G L R Q H H C R K C G K A I C G K C S S K R S T Y P I M G F E F Q V R M 80  
 WDFY1 (Drosophila melanogaster) S V V V F W E M N A M R K E V P G W D T N N C Q L C S R P F F W N F R S M W D Q K Q L G L R Q H H C R H C G K A V C D N C S T N R I N I P I M G F E F D V R T 80  
 WDFY1 (Caenorhabditis elegans) G K I M C W M N C K R V E T P E W K T S D S C Q K C N Q P F F W N I Q A M W Q R K V V G L R Q H H C R T C G S A V C G S C D N W T T Y P P M G Y E T K I R I 80  
 Consensus G G I A V W N M D V S R E E A P Q W L E S D S C Q K C E Q P F F W N I K Q M W D T K T L G L R Q H H C R K C G Q A V C G K C S S K R S S Y P V M G F E F Q V R V  
 Conservation

WDFY1 (Homo sapiens) C D S C Y S I K 69  
 WDFY1 (Mus musculus) C D S C Y S I K 69  
 WDFY1 (Gallus gallus) C D S C F E S I K 69  
 WDFY1 (Xenopus tropicalis) C D S C Y E T I K 69  
 WDFY1 (Danio rerio) C D D C F N I I K 69  
 WDFY1 (Drosophila melanogaster) C D P C Y K Q L Q 69  
 WDFY1 (Caenorhabditis elegans) C N D C N A R M K 69  
 Consensus C D S C Y S I K  
 Conservation

WDFY2 (Homo sapiens) G G I V W N M D V E R Q E T P E W L D S D S C Q K C D Q P F F W N F K Q M W D S K K I G L R Q H H C R K C G K A V C G K C S S K R S S I P I M G F E F E V R V 80  
 WDFY2 (Mus musculus) G G I V W N M D V E R Q E T P E W L D S D S C Q K C D Q P F F W N F K Q M W D S K K I G L R Q H H C R K C G K A V C G K C S S K R S S I P I M G F E F E V R V 80  
 WDFY2 (Gallus gallus) G G I V W N M D V E R Q E T P E W L D S D S C Q K C D Q P F F W N F K Q M W D S K K I G L R Q H H C R K C G K A V C G K C S S K R S S I P I M G F E F E V R V 80  
 WDFY2 (Xenopus tropicalis) G G I V W N M D V E R Q E T P E W L D S D S C Q K C D Q P F F W N F K Q M W D H K K I G L R Q H H C R K C G K A V C G K C S S K R S T I P I M G F E F E V R V 80  
 WDFY2 (Danio rerio) G G I V W N M D V T R Q E T P E W L D S D S C Q K C E Q P F F W N F K Q M W D S K K I G L R Q H H C R K C G Q A V C G K C S S K R S T I P I M G F E F E V R V 80  
 WDFY2 (Drosophila melanogaster) S V V V F W E M N A M R K E V P G W D T N N C Q L C S R P F F W N F R S M W D Q K Q L G L R Q H H C R H C G K A V C D N C S T N R I N I P I M G F E F D V R T 80  
 WDFY2 (Caenorhabditis elegans) G K I M C W M N C K R V E T P E W K T S D C C Q K C N Q P F F W N I Q A M W Q R K V V G L R Q H H C R T C G S A V C G S C D N W T T Y P P M G Y E T K I R I 80  
 Consensus G G I V W N M D V E R Q E T P E W L D S D S C Q K C D Q P F F W N F K Q M W D S K K I G L R Q H H C R K C G K A V C G K C S S K R S S I P I M G F E F E V R V  
 Conservation

WDFY2 (Homo sapiens) C D S C H E A I T 69  
 WDFY2 (Mus musculus) C D S C H E A I T 69  
 WDFY2 (Gallus gallus) C D S C H E S I T 69  
 WDFY2 (Xenopus tropicalis) C D S C H E S I T 69  
 WDFY2 (Danio rerio) C D S C H D L I T 69  
 WDFY2 (Drosophila melanogaster) C D P C Y K Q L Q 69  
 WDFY2 (Caenorhabditis elegans) C N D C N A R M K 69  
 Consensus C D S C H E X I T  
 Conservation

FGD5 (Homo sapiens) E R P P T L V P V T H V M M C N C G C D F S L T L R R H H C H A C G K I V C R N C S R N K Y P L K Y L K D R M A K V C D G C F G E L K 68  
 FGD5 (Mus musculus) E R L P T L V P V T H A M M C N C G C D F S L T L R R H H C H A C G K I V C R N C S R N K Y P L K C I K N R M A K V C D G C F R E L K 68  
 FGD5 (Gallus gallus) E R P P T L V P V S H V M M C N C G C D F T L T L R R H H C H A C G K I V C R N C S R N K Y P M K Y L R D Q A A K V C D S C Y V E L K 68  
 FGD5 (Danio rerio) E A A P L V P V S H V M M C N C T S D F S L T L R R H H C N A C G K V V C R S C S R N R Y P L K Y L K D R M A K V C D H C Y N K P R 68  
 FGD5 (Xenopus tropicalis) E R P P S V A H M S H A V M C N C G S D F T L T L R R H H C H A C G K I C R S C S R N K Y P L K Y L K D R P S K V C N G C F A E L R 68  
 Consensus E R P P T L V P V S H V M M C N C G C D F S L T L R R H H C H A C G K I V C R N C S R N K Y P L K Y L K D R M A K V C D G C F A E L K  
 Conservation

DFCP1\_B (Homo sapiens) A R P A Y W P D H E I L H C H N C R K E F S I K L S K H H C R A C G Q G F C D E C S H D R R A V P S R G W D H P V R V C F N C N K K P G 69  
 DFCP1\_B (Gallus gallus) A R P A Y W P D H E I L H C H N C R K E F S I K L S K I I H C R A C G Q G F C D E C S H D R R A V P S R G W D H P V R V C F N C N K K P G 69  
 DFCP1\_B (Mus musculus) A R P A Y W P D H E I L H C H N C R K E F S V K L S K H H C R A C G Q G F C D E C S H D C R A V P S R G W D H P V R V C F N C N K K P G 69  
 DFCP1\_B (Xenopus tropicalis) A R P T Y W I P D H E I K H C Y S C R K E F S S K L S K I I H C R A C G Q G F C D E C S N E R R P V P S R G W D H P V R V C I N C N K K P G 69  
 DFCP1\_B (Danio rerio) A R P A Y W P D Q I R C C N Q C R Q E F N A R L S I H H C R A C G Q G V C N D C S P D R R A V P S R G W D H P V R V C T T C N Q K S G 69  
 Consensus A R P A Y W P D H E I L H C H N C R K E F S I K L S K H H C R A C G Q G F C D E C S H D R R A V P S R G W D H P V R V C F N C N K K P G  
 Conservation

FYCO1 (Homo sapiens) S A E E R W L G D T E A N H C L D C K R E F S W I V R R H H C R I C G R I F C Y Y C C N N Y V L S K H G G K K E R C C R A C F Q K L S 67  
 FYCO1 (Mus musculus) S A E E K L G D M E V N H C H D C K R E F S W I V R R H H C R I C G R I F C Y Y C C N N Y V V T K P S G K K E R C C R A C F Q K F G 67  
 FYCO1 (Gallus gallus) S A E Q K W Q G D T E V N H C L D C Q R E F S W I V R R H H C R I C G R I F C Y Y C C N N Y M V T K P G G R K E R C C K A C F N K P R 67  
 FYCO1 (Danio rerio) R A E E Q W L V D K E A T H C L G C Q G Q F T W M V R R H H C R L C G R I F C Y Y C S N N Y M V K N S K K E R C C R E C Y T Q I G 66  
 Consensus S A E E R W L G D T E A N H C L D C K R E F S W I V R R H H C R I C G R I F C Y Y C C N N Y V V T K P G G K K E R C C R A C F Q K Y G  
 Conservation

EEA1 (Homo sapiens) A L N R K W A E D N E V Q N C M A C G K G F S V T V R R H H C R Q C G N I F C A E C S A K N A L T P S S K K P V R V C D A C F N D L Q 67  
 EEA1 (Gallus gallus) A L N R K W A E D N E V Q N C M A C G K G F S V T V R R H H C R Q C G N I F C A E C S A K N A L T P S S K K P V R V C D T C F N D I Q 67  
 EEA1 (Mus musculus) A L N R K W A E D N E V Q N C M A C G K G F S V T V R R H H C R Q C G N I F C A E C S T K N A L T P S S K K P V R V C D A C F N D L Q 67  
 EEA1 (Danio rerio) S L T R K W I E D H E V Q N C M A C G K G F S V T V R K H H C R H C G N I F C A E C S A R N A L T P S S K K P V R V C D N C F D I Q 67  
 EEA1 (Xenopus tropicalis) A L S R K W I E D H E V Q N C M S C G R G F S V T V R R H H C R Q C G N I F C H E C S S K N A L T P S S K K A V R V C D T C F G D L Q 67  
 EEA1 (Caenorhabditis elegans) Y S S R K W L D D A E A I N C T E C G K F V S L T V R K H H C R V C G K I Y C N P C S S K S V R I A S A K N P V R A C N T C F T D S Q 67  
 Consensus A L N R K W A E D N E V Q N C M A C G K G F S V T V R R H H C R Q C G N I F C A E C S A K N A L T P S S K K P V R V C D T C F N D L Q  
 Conservation

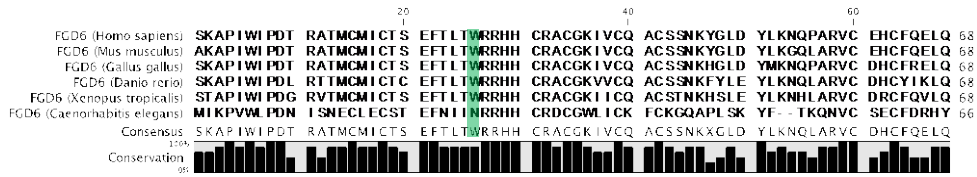

**Supplemental Figure 1. ALFY-FYVE contains a highly conserved glutamic acid not found in other human FYVE domains or their homologous.** The sequences for the human FYVE domains and their homologues found in *Mus musculus*, *Gallus gallus*, *Danio rerio*, *Xenopus tropicalis*, *Caenorhabditis elegans*, and *Drosophila melanogaster* were obtained using Proviz. A sequence alignment was performed for each individual human FYVE domains and a consensus sequence as well as a conservation plot produced using CLC sequence viewer 7. The human FYVE domains and their homologues were sorted according to the identity of the residue corresponding to the conserved glutamic residue in ALFY-FYVE. Negatively charged residues are red, positively charged residues and blue, polar residues are yellow, and nonpolar residues are green.

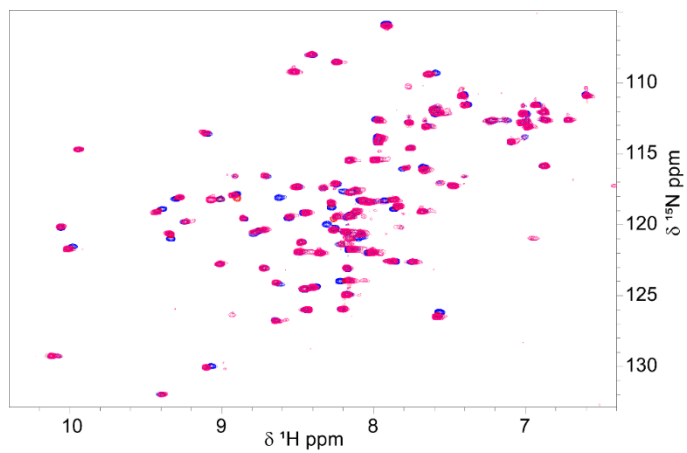

**Supplemental Figure 2.  $^1\text{H}$ - $^{15}\text{N}$  HSQC spectra of a buffer titration used to transfer peak assignments.**  $^1\text{H}$ - $^{15}\text{N}$  HSQC spectra of 50  $\mu\text{M}$  ALFY-FYVE in the presence of decreasing concentrations of sodium phosphate buffer and increasing concentrations of Bis-Tris buffer.

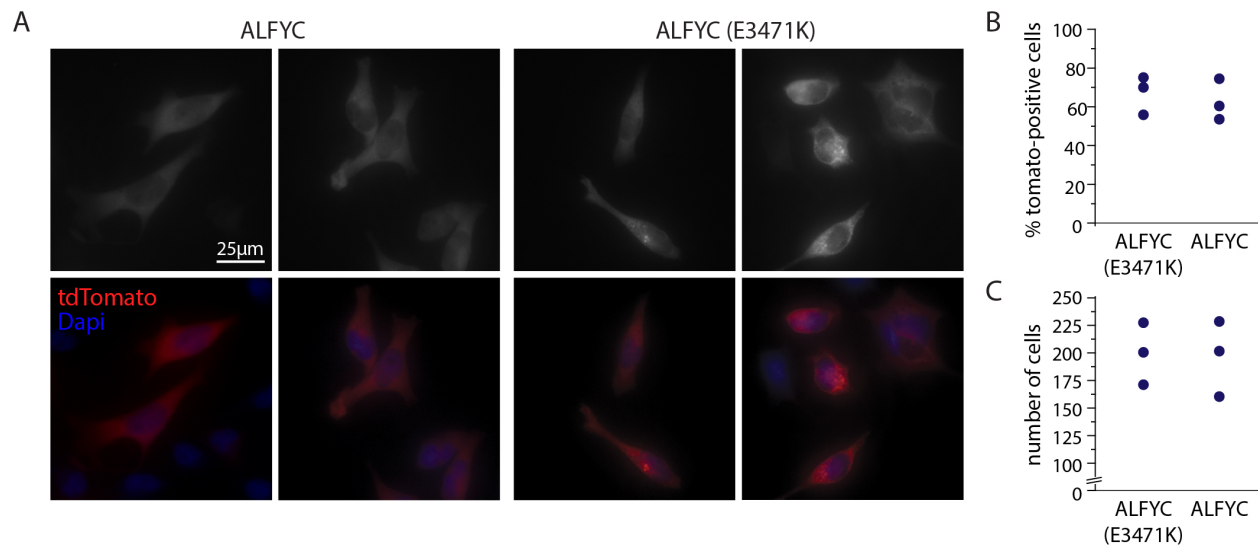

**Supplemental Figure 3. Representative microscopy images and transfection efficiencies of tdTomato-ALFYC and tdTomato-ALFYC E3471K.** A) Representative microscopy images of tdTomato-ALFYC and tdTomato-ALFYC E3471K. The mean gray scale intensity of the tdTomato signal (top) per cell was determined using Image J; tdTomato-ALFYC ( $8704.666 \pm 3316.872$ ); tdTomato-ALFYC E3471K ( $9125.638 \pm 5387.893$ ). A pairwise two-tail student t-test revealed no difference between the mean intensities for these two groups ( $p=0.1121$ ). B) Percent of cells that were positive for tdTomato signal. A pairwise two-tail student t-test revealed that there is no difference between these two groups ( $p=0.677$ ). C) The total number of cells counted per replicate to determine the transfection efficiencies of tdTomato-ALFYC and tdTomato-ALFYC E3471K. Pairwise two-tail student t-test reveals no difference between these two groups ( $p=0.427$ ).
